# Supplementary material for: Cellulose nanocrystal/silver (CNC/Ag) thin-film nanocomposite nanofiltration membranes with multifunctional properties
Source: Royal Society of Chemistry journal article supplement (doi:10.1039/c9en01367a), 2020-01-01
Supplement: c9en01367a1.pdf [file c9en01367a1.pdf]

## Supporting Information

*for*

### **Cellulose Nanocrystal/Silver (CNC/Ag) Thin-film Nanocomposite Nanofiltration Membranes with Multifunctional Properties**

Chunyan Xu, Wensi Chen, Haiping Gao, Xing Xie, Yongsheng Chen \*

*School of Civil & Environmental Engineering, Georgia Institute of Technology, Atlanta, GA  
311 Ferst Dr NW, Atlanta, Georgia 30332-0100, United States*

\*Corresponding author: [yongsheng.chen@ce.gatech.edu](mailto:yongsheng.chen@ce.gatech.edu)

Number of pages: 3

Number of figures: 3

## Supporting Figures

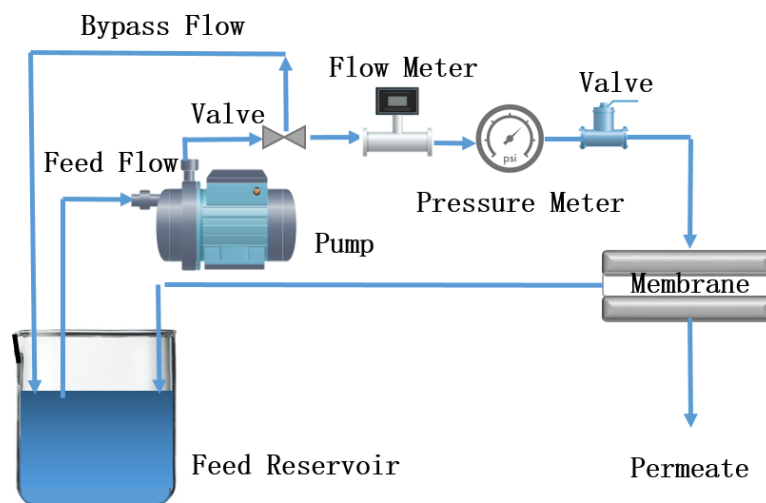

**Figure S1.** Schematic of cross-flow system used in this study.

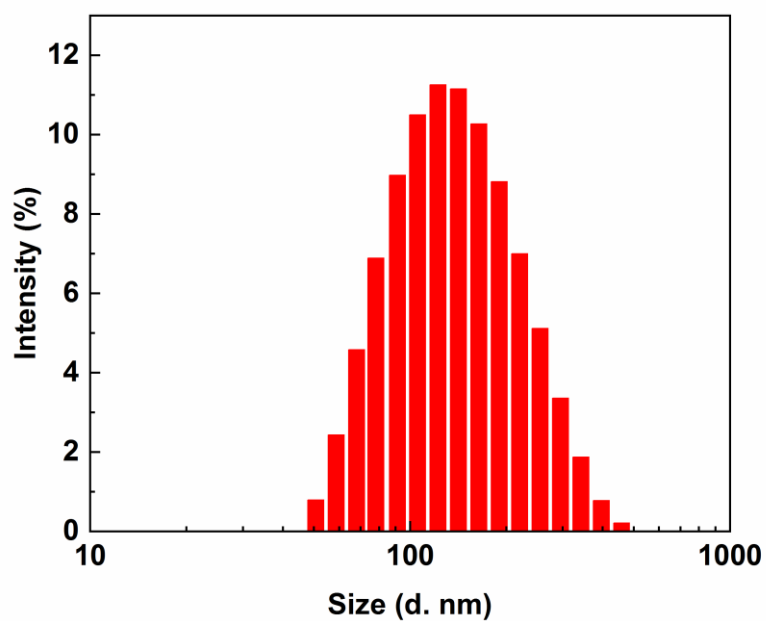

**Figure S2.** Size distribution of CNCs. Measured by Malvern Zetasizer Nano ZS (Malvern Instruments Ltd, Malvern, UK).

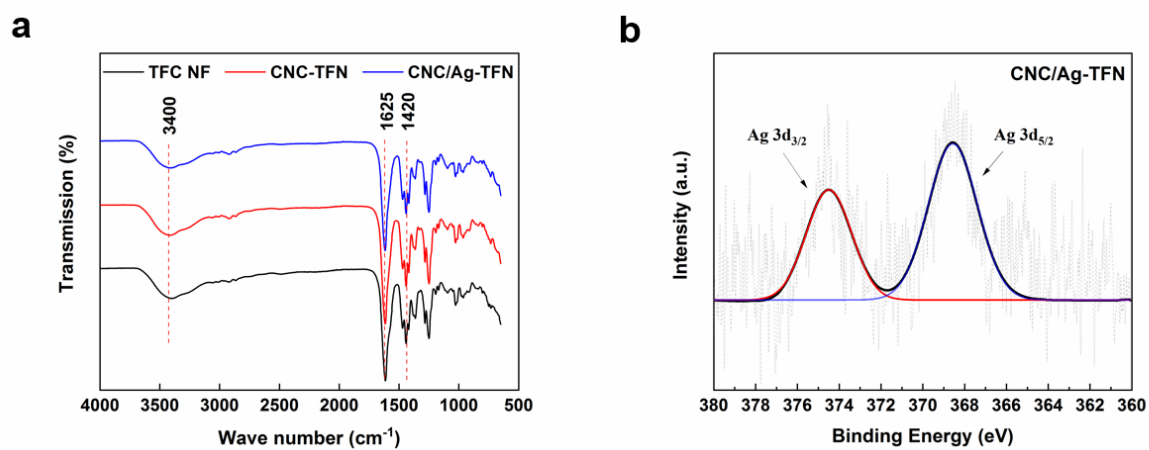

**Figure S3.** (a) FT-IR and (b) Ag 3d XPS spectrum for CNC/Ag TFN membrane.
